# Supplementary material for: Unveiling the toxic effects of perfluorooctanoic acid on osteoblast function and extracellular matrix deposition using 2D and 3D models
Source: Springer Nature journal article supplement (doi:10.1038/s41420-025-02863-5), 2026-01-09

# Supplemental Material – Original Western Blots

Relevant areas for cropped blots in the main and Supplementary figures are shown with dashed box

2D

Figure 3a

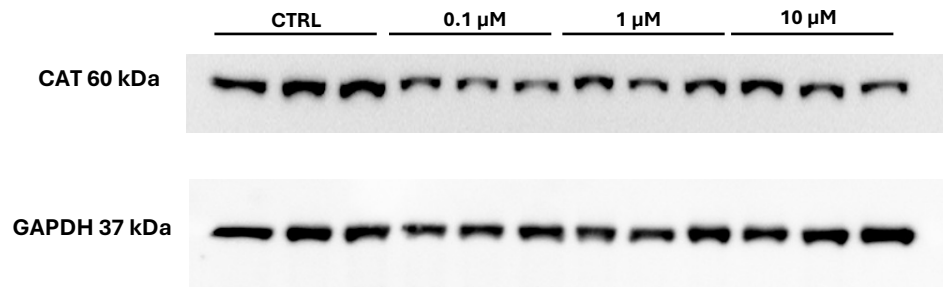

3D

Figure 3c

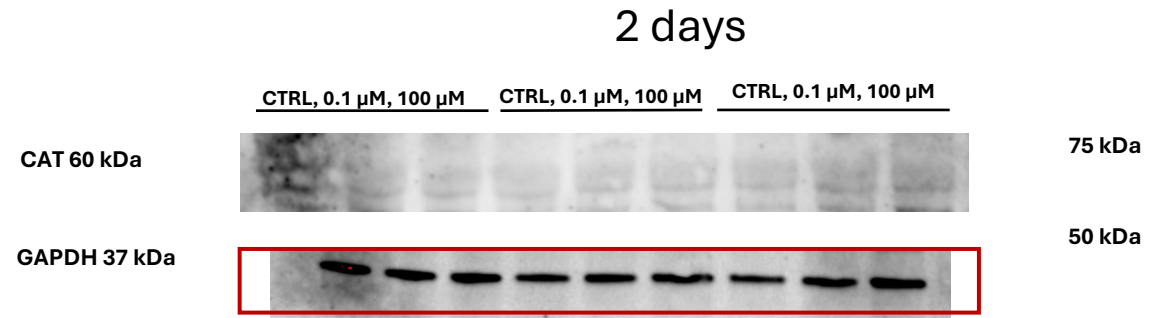

Figure 3e

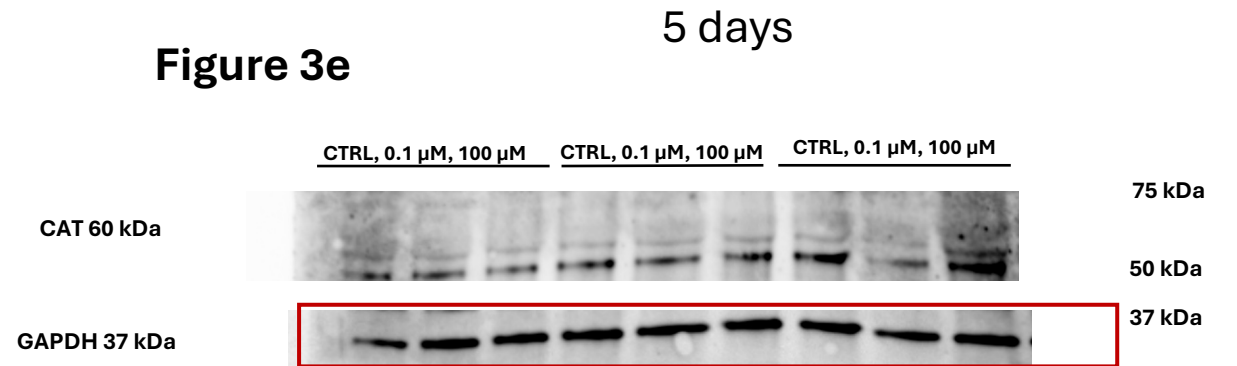

2D

Figure 3b

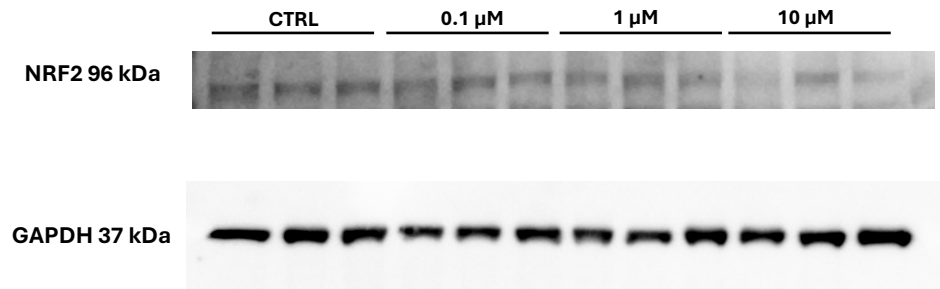

3D

Figure 3f

5 days

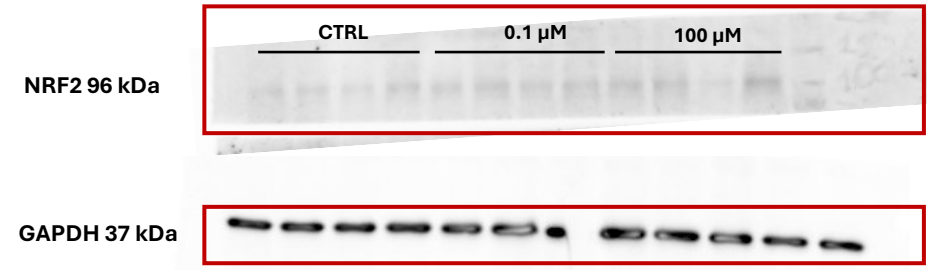

Figure 3d

2 days

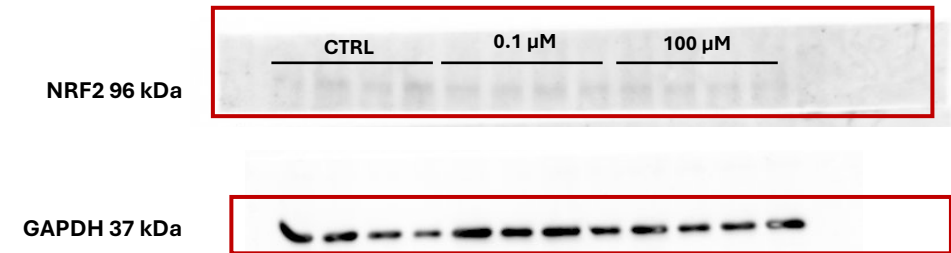

2D

Figure 4a

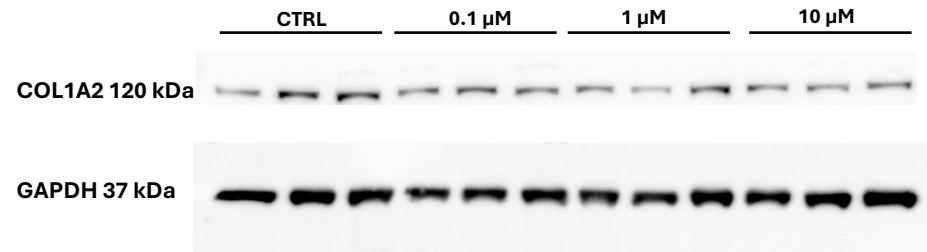

3D

Figure 4e

2 days

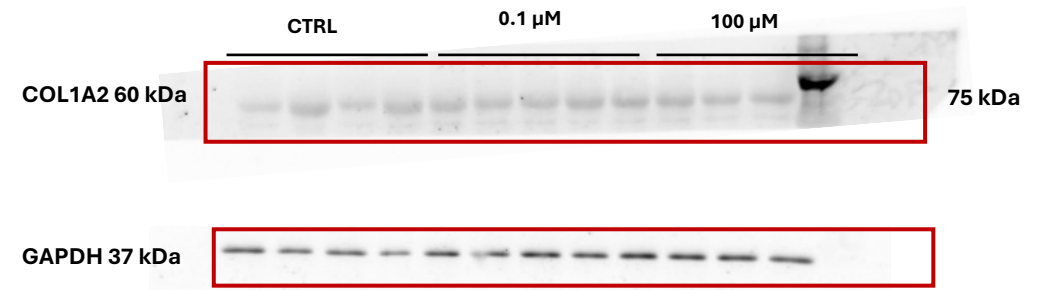

5 days

Figure 4f

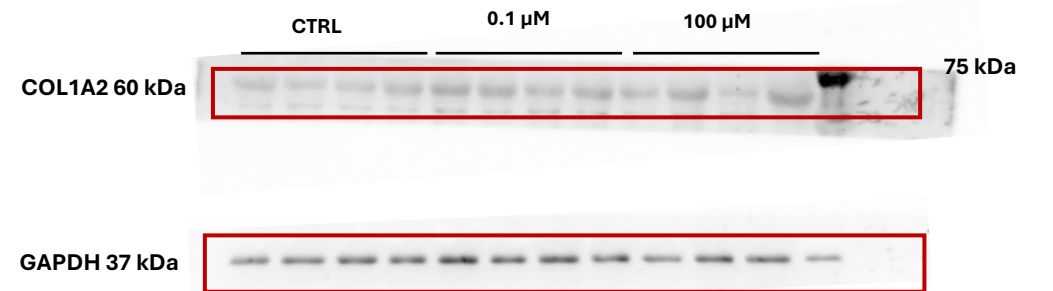

2D

Figure 4b

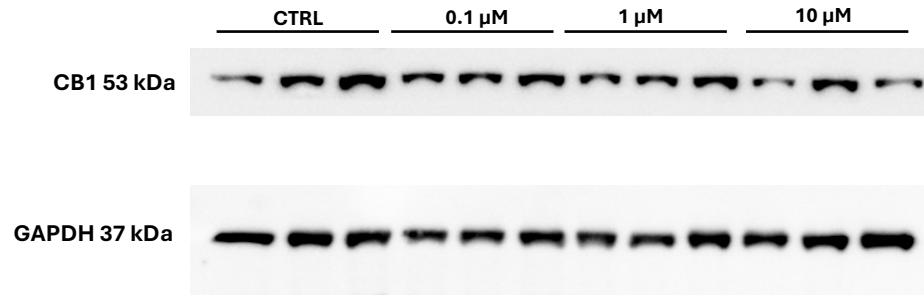

3D

Figure 4d

5 days

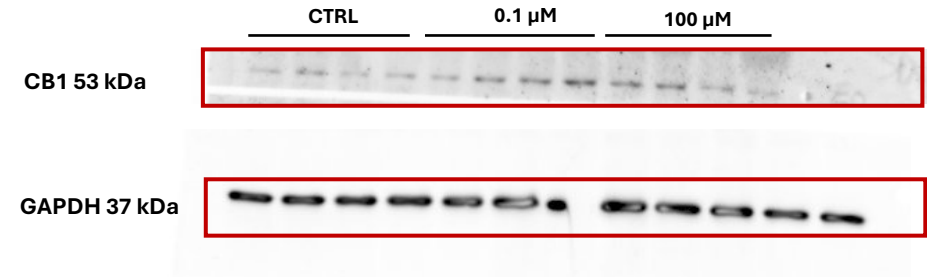

2 days

Figure 4c

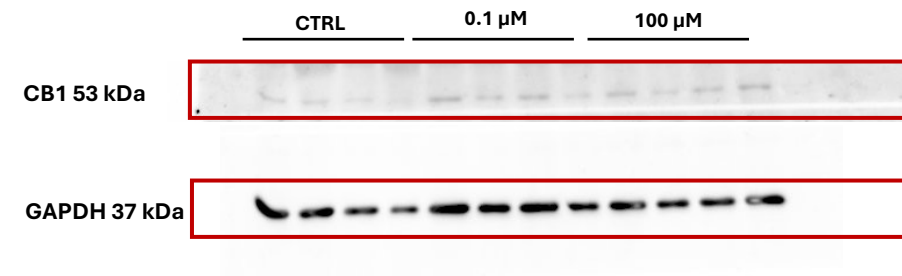

**Figure S2a and S2c**

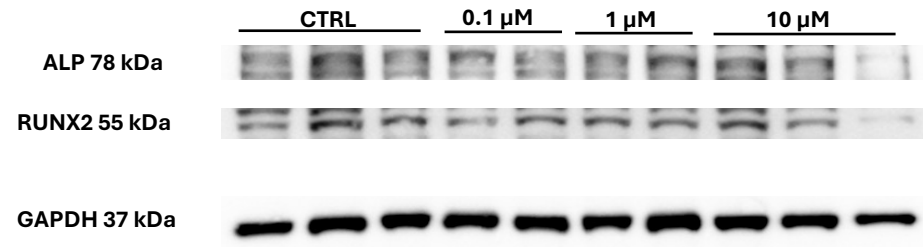

Supplement: MOESM2 [file 41420_2025_2863_MOESM2_ESM.pdf]
