# Supplementary material for: Unveiling the toxic effects of perfluorooctanoic acid on osteoblast function and extracellular matrix deposition using 2D and 3D models
Source: Cell Death Discov. 2026 Jan 9;12:10. doi: 10.1038/s41420-025-02863-5 (PMC12789562; doi:10.1038/s41420-025-02863-5)
Supplement: Supplementary file 3 — Live Dead Quantification [file 41420_2025_2863_MOESM3_ESM.xlsx]

## Sheet: day7
red -> ioduro		25 stack
CtrlV1 (61-36)				CtrlV2(63-38)				CtrlV3(55-30)
C1 (red)	Area			C1 (red)	Area			C1 (red)	Area			CtrlV4 (52-27)				CtrlV5 (56-31)				CtrlV6 (62-37)				CtrlV7 (57-32)
z-stack61	199.601			z-stack63	16.616			z-stack55	406.942			C1 (red)	Area			C1 (red)	Area			C1 (red)	Area			C1 (red)	Area
z-stack60	377.838			z-stack62	25.182			z-stack54	342.954			z-stack52	10.114			z-stack56	13.933			z-stack62	7.637			z-stack57	8.566
z-stack59	389.604			z-stack61	69.148			z-stack53	500.963			z-stack51	24.253			z-stack55	13.83			z-stack61	10.217			z-stack56	8.36
z-stack58	368.338			z-stack60	370.511			z-stack52	543.175			z-stack50	61.717			z-stack54	18.784			z-stack60	14.139			z-stack55	9.392
z-stack57	309.309			z-stack59	648.032			z-stack51	525.526			z-stack49	61.924			z-stack53	19.196			z-stack59	16.719			z-stack54	9.598
z-stack56	372.471			z-stack58	701.287			z-stack50	621.199			z-stack48	80.398			z-stack52	37.98			z-stack58	20.022			z-stack53	10.114
z-stack55	451.527			z-stack57	947.227			z-stack49	693.546			z-stack47	80.811			z-stack51	51.603			z-stack57	21.054			z-stack52	11.043
z-stack54	428.616			z-stack56	1420.84			z-stack48	878.492			z-stack46	88.551			z-stack50	51.087			z-stack56	21.054			z-stack51	12.901
z-stack53	456.894			z-stack55	2113.05			z-stack47	986.446			z-stack45	85.145			z-stack49	55.628			z-stack55	24.15			z-stack50	32.2
z-stack52	854.651			z-stack54	2445.68			z-stack46	758.153			z-stack44	65.742			z-stack48	57.589			z-stack54	32.613			z-stack49	40.766
z-stack51	1003.37			z-stack53	2799.16			z-stack45	559.068			z-stack43	91.75			z-stack47	57.589			z-stack53	38.393			z-stack48	43.966
z-stack50	786.019			z-stack52	3133.45			z-stack44	779.517			z-stack42	77.818			z-stack46	77.198			z-stack52	42.108			z-stack47	44.275
z-stack49	1063.44			z-stack51	2134.51			z-stack43	742.879			z-stack41	53.151			z-stack45	96.911			z-stack51	42.418			z-stack46	46.03
z-stack48	1098.73			z-stack50	2719.49			z-stack42	565.777			z-stack40	83.803			z-stack44	106.406			z-stack50	48.507			z-stack45	59.55
z-stack47	930.198			z-stack49	2941.07			z-stack41	324.79			z-stack39	83.803			z-stack43	147.275			z-stack49	69.974			z-stack44	54.08
z-stack46	1201.01			z-stack48	2636.71			z-stack40	321.281			z-stack38	114.146			z-stack42	151.61			z-stack48	80.294			z-stack43	54.596
z-stack45	1258.81			z-stack47	2657.56			z-stack39	369.066			z-stack37	101.865			z-stack41	102.277			z-stack47	63.265			z-stack42	128.698
z-stack44	2772.53			z-stack46	2428.24			z-stack38	394.764			z-stack36	84.01			z-stack40	68.529			z-stack46	54.08			z-stack41	147.069
z-stack43	1682.98			z-stack45	2371.99			z-stack37	121.061			z-stack35	66.981			z-stack39	51.087			z-stack45	50.365			z-stack40	111.05
z-stack42	1230.42			z-stack44	2460.13			z-stack36	58.312			z-stack34	63.162			z-stack38	44.585			z-stack44	52.222			z-stack39	81.017
z-stack41	1003.99			z-stack43	1912.41			z-stack35	49.436			z-stack33	61.717			z-stack37	44.069			z-stack43	21.467			z-stack38	53.874
z-stack40	1093.68			z-stack42	2319.46			z-stack34	61.924			z-stack32	59.137			z-stack36	26.318			z-stack42	23.841			z-stack37	50.055
z-stack39	1136.1			z-stack41	1845.43			z-stack33	46.649			z-stack31	40.457			z-stack35	25.286			z-stack41	19.403			z-stack36	40.457
z-stack38	349.972			z-stack40	1760.29			z-stack32	63.472			z-stack30	37.877			z-stack34	27.04			z-stack40	18.164			z-stack35	37.051
z-stack37	501.892			z-stack39	1473.99			z-stack31	85.145			z-stack29	32.613			z-stack33	10.94			z-stack39	16.926			z-stack34	29.62
z-stack36	364.525			z-stack38	1254.99			z-stack30	100.213			z-stack28	30.446			z-stack32	12.385			z-stack38	8.05			z-stack33	19.3
	867.461				1900.04				436.03			z-stack27	20.951			z-stack31	9.805			z-stack37	3.922			z-stack32	14.552
													66.4937				55.1576				32.8402				46.3272
C0 (green)	Area			C0 (green)	Area			C0 (green)	Area
z-stack61	6219.21			z-stack63	4322.59			z-stack55	4728.29			C0 (green)	Area			C0 (green)	Area			C0 (green)	Area			C0 (green)	Area
z-stack60	6753.2			z-stack62	4510.42			z-stack54	6023.84			z-stack52	2133.27			z-stack56	2063.92			z-stack62	2410.28			z-stack57	2735.17
z-stack59	8856.54			z-stack61	5389.85			z-stack53	7188.73			z-stack51	2605.75			z-stack55	2215.94			z-stack61	3071.42			z-stack56	3740.2
z-stack58	9765.77			z-stack60	6636.89			z-stack52	8322.55			z-stack50	3043.76			z-stack54	3208.89			z-stack60	3461.13			z-stack55	4631.48
z-stack57	9828.64			z-stack59	7100.8			z-stack51	9510.67			z-stack49	3669.4			z-stack53	4328.88			z-stack59	3923.39			z-stack54	5899.89
z-stack56	11338.8			z-stack58	7508.88			z-stack50	10067.3			z-stack48	4288.74			z-stack52	5503.16			z-stack58	4522.7			z-stack53	7421.56
z-stack55	13618.8			z-stack57	7069.73			z-stack49	9255.13			z-stack47	4990.23			z-stack51	5976.37			z-stack57	5549.19			z-stack52	7917.57
z-stack54	16519.4			z-stack56	8434.64			z-stack48	10149.7			z-stack46	5216.46			z-stack50	6341.92			z-stack56	6634			z-stack51	7439.31
z-stack53	17128.4			z-stack55	8773.05			z-stack47	9515.52			z-stack45	5492.74			z-stack49	6329.44			z-stack55	7107.3			z-stack50	7557.28
z-stack52	15735.3			z-stack54	8344.95			z-stack46	10195.2			z-stack44	5677.58			z-stack48	6804.91			z-stack54	7346.53			z-stack49	7709.51
z-stack51	13968.5			z-stack53	9401.99			z-stack45	11056			z-stack43	6142.53			z-stack47	7243.33			z-stack53	7059			z-stack48	7903.64
z-stack50	13352.5			z-stack52	10533.9			z-stack44	12534.3			z-stack42	6931.54			z-stack46	7704.14			z-stack52	6887.26			z-stack47	9118.07
z-stack49	12019.4			z-stack51	11178.6			z-stack43	12526.2			z-stack41	7464.29			z-stack45	8278.38			z-stack51	6842.37			z-stack46	9363.7
z-stack48	10866.6			z-stack50	10332.2			z-stack42	12741			z-stack40	7344.98			z-stack44	8672.11			z-stack50	7326.2			z-stack45	9562.78
z-stack47	13996.8			z-stack49	10410.7			z-stack41	13069.8			z-stack39	7232.28			z-stack43	9082.88			z-stack49	7615.9			z-stack44	10537.8
z-stack46	12793.8			z-stack48	9033.34			z-stack40	13293.3			z-stack38	6589.72			z-stack42	9587.45			z-stack48	8385.51			z-stack43	11600.8
z-stack45	12411.9			z-stack47	9442.14			z-stack39	12777.7			z-stack37	6147.59			z-stack41	8893.28			z-stack47	8621.23			z-stack42	11638.2
z-stack44	10694.9			z-stack46	9164.61			z-stack38	12882.5			z-stack36	6016.2			z-stack40	8494.29			z-stack46	7586.59			z-stack41	10904.1
z-stack43	13930.6			z-stack45	10717.1			z-stack37	11290.3			z-stack35	5765.1			z-stack39	7725.09			z-stack45	7916.44			z-stack40	10750.3
z-stack42	11665.2			z-stack44	10712.5			z-stack36	11889			z-stack34	5750.03			z-stack38	8045.34			z-stack44	7399.89			z-stack39	10913.5
z-stack41	10017.6			z-stack43	8777.49			z-stack35	11020.9			z-stack33	5693.58			z-stack37	8549.09			z-stack43	7751.62			z-stack38	9826.79
z-stack40	10177.9			z-stack42	8430.92			z-stack34	10889.5			z-stack32	5223.17			z-stack36	8617.31			z-stack42	7818.49			z-stack37	8418.95
z-stack39	10405.4			z-stack41	7776.9			z-stack33	10469			z-stack31	5216.05			z-stack35	8594.61			z-stack41	7193.06			z-stack36	8188.39
z-stack38	10392.5			z-stack40	7562.13			z-stack32	10602			z-stack30	4788.87			z-stack34	8457.96			z-stack40	6623.37			z-stack35	8030.07
z-stack37	10287.6			z-stack39	8411.72			z-stack31	10050.1			z-stack29	4412.07			z-stack33	8542.18			z-stack39	6206.72			z-stack34	7113.18
z-stack36	9862.5			z-stack38	9524.18			z-stack30	9847.74			z-stack28	4444.99			z-stack32	6219.11			z-stack38	5955.1			z-stack33	6930.82
	12649.1				8780.09				10875.8			z-stack27	4431.47			z-stack31	6258.74			z-stack37	6038.7			z-stack32	6567.94
													5468.5				7269.55				6690.14				8496.84
0.1uM1 (63-38)				0.1uM2 (54-29)				0.1uM3 (55-30)
C1 (red)	Area			C1 (red)	Area			C1 (red)	Area			C1 (red)	Area
z-stack63	77.921			z-stack54	307.245			z-stack55	177.618			z-stack56	195.989
z-stack62	155.222			z-stack53	353.585			z-stack54	259.873			z-stack55	238.406
z-stack61	277.935			z-stack52	479.084			z-stack53	298.369			z-stack54	255.023
z-stack60	358.745			z-stack51	439.349			z-stack52	309.722			z-stack53	197.743
z-stack59	449.67			z-stack50	481.148			z-stack51	448.122			z-stack52	188.248
z-stack58	347.289			z-stack49	446.264			z-stack50	615.522			z-stack51	342.954
z-stack57	455.656			z-stack48	661.965			z-stack49	501.376			z-stack50	604.582
z-stack56	489.404			z-stack47	710.678			z-stack48	484.244			z-stack49	728.843
z-stack55	587.141			z-stack46	878.698			z-stack47	605.202			z-stack48	848.665
z-stack54	693.753			z-stack45	1160.86			z-stack46	693.34			z-stack47	1093.37
z-stack53	1029.48			z-stack44	1023.39			z-stack45	604.995			z-stack46	1385.23
z-stack52	1133.52			z-stack43	834.113			z-stack44	730.081			z-stack45	1067.57
z-stack51	1309.38			z-stack42	786.948			z-stack43	758.463			z-stack44	961.573
z-stack50	1863.7			z-stack41	947.64			z-stack42	856.096			z-stack43	1311.96
z-stack49	1474.51			z-stack40	1555.63			z-stack41	1159.73			z-stack42	1343.44
z-stack48	2172.8			z-stack39	1291.42			z-stack40	322.416			z-stack41	1725.2
z-stack47	2241.12			z-stack38	1440.86			z-stack39	567.015			z-stack40	2451.25
z-stack46	2257.53			z-stack37	1733.76			z-stack38	465.77			z-stack39	2859.54
z-stack45	2227.4			z-stack36	2508.64			z-stack37	237.89			z-stack38	2579.54
z-stack44	2580.57			z-stack35	3264.11			z-stack36	258.945			z-stack37	3174.62
z-stack43	1866.8			z-stack34	3568.56			z-stack35	149.133			z-stack36	3843.61
z-stack42	1966.29			z-stack33	2836.93			z-stack34	289.081			z-stack35	3219.93
z-stack41	2614.53			z-stack32	2706.28			z-stack33	405.601			z-stack34	2576.96
z-stack40	2940.66			z-stack31	3735.76			z-stack32	381.45			z-stack33	2357.75
z-stack39	3244.6			z-stack30	3280.72			z-stack31	279.586			z-stack32	2341.23
z-stack38	3149.44			z-stack29	2933.95			z-stack30	344.606			z-stack31	2123.47
	1518.6				1614.7				488.17				1600.67
C0 (green)	Area			C0 (green)	Area			C0 (green)	Area			C0 (green)	Area
z-stack63	4773.19			z-stack54	6287.84			z-stack55	6610.77			z-stack56	3928.24
z-stack62	6666.2			z-stack53	6891.6			z-stack54	6715.84			z-stack55	5145.66
z-stack61	8368.48			z-stack52	7821.07			z-stack53	8566.53			z-stack54	6349.56
z-stack60	9740.4			z-stack51	8457.55			z-stack52	10270.7			z-stack53	7004.2
z-stack59	11075.4			z-stack50	9127.67			z-stack51	11827.9			z-stack52	8637.75
z-stack58	11690.5			z-stack49	10141.8			z-stack50	12037.3			z-stack51	9141.08
z-stack57	12379.6			z-stack48	11075.3			z-stack49	11999.2			z-stack50	9806.04
z-stack56	12735.6			z-stack47	11603.1			z-stack48	11925			z-stack49	10030.3
z-stack55	13059			z-stack46	10769.2			z-stack47	11994.7			z-stack48	9500.45
z-stack54	12930.7			z-stack45	10856.5			z-stack46	11927.9			z-stack47	10294.4
z-stack53	13713.3			z-stack44	10476.7			z-stack45	12330.4			z-stack46	9832.57
z-stack52	14659.5			z-stack43	10422.4			z-stack44	11134.7			z-stack45	8830.43
z-stack51	14965.3			z-stack42	9636.89			z-stack43	10823.4			z-stack44	8459.72
z-stack50	13611.6			z-stack41	10895.1			z-stack42	10765.8			z-stack43	8022.84
z-stack49	13629.5			z-stack40	9408.8			z-stack41	10553.9			z-stack42	7829.33
z-stack48	13671.2			z-stack39	10416.3			z-stack40	10410.8			z-stack41	7726.23
z-stack47	12029.6			z-stack38	10272.5			z-stack39	10220.7			z-stack40	8734.24
z-stack46	11665.7			z-stack37	10961			z-stack38	10285.1			z-stack39	9844.23
z-stack45	12436.8			z-stack36	10518.4			z-stack37	10292.1			z-stack38	9733.07
z-stack44	12225.5			z-stack35	10628.9			z-stack36	9841.96			z-stack37	9958.37
z-stack43	10859			z-stack34	10209.2			z-stack35	10273.9			z-stack36	9667.23
z-stack42	11120			z-stack33	9993.77			z-stack34	10354.9			z-stack35	9705
z-stack41	11430.9			z-stack32	10202.9			z-stack33	11000.3			z-stack34	9395.9
z-stack40	10839.2			z-stack31	12623.6			z-stack32	11462.7			z-stack33	9598.08
z-stack39	10278.6			z-stack30	11635.6			z-stack31	11492.2			z-stack32	9891.81
z-stack38	11082			z-stack29	10156.7			z-stack30	11827.2			z-stack31	10079.5
	12065.5				10459.6				11077.8				9085.85
1uM1 (62-37)				1uM2 (65-40)				1uM3 (65-40)
C1 (red)	Area			C1 (red)	Area			C1 (red)	Area
z-stack62	73.896			z-stack65	76.269			z-stack65	33.542
z-stack61	125.396			z-stack64	40.973			z-stack64	32.51
z-stack60	223.958			z-stack63	54.39			z-stack63	75.134
z-stack59	350.798			z-stack62	115.488			z-stack62	74.102
z-stack58	429.648			z-stack61	173.077			z-stack61	93.402
z-stack57	425.623			z-stack60	197.95			z-stack60	130.35
z-stack56	439.04			z-stack59	183.088			z-stack59	195.473
z-stack55	285.778			z-stack58	397.654			z-stack58	245.218
z-stack54	379.696			z-stack57	565.364			z-stack57	308.69
z-stack53	355.855			z-stack56	777.04			z-stack56	269.265
z-stack52	323.965			z-stack55	1279.86			z-stack55	201.768
z-stack51	232.317			z-stack54	1780.72			z-stack54	325.203
z-stack50	307.761			z-stack53	1779.59			z-stack53	288.049
z-stack49	490.849			z-stack52	1617.76			z-stack52	292.487
z-stack48	813.781			z-stack51	2029.24			z-stack51	196.814
z-stack47	998.624			z-stack50	1202.04			z-stack50	239.851
z-stack46	1275.42			z-stack49	1044.65			z-stack49	180.714
z-stack45	1232.7			z-stack48	2360.64			z-stack48	160.589
z-stack44	974.474			z-stack47	2348.87			z-stack47	225.919
z-stack43	476.813			z-stack46	2539.29			z-stack46	270.091
z-stack42	331.602			z-stack45	2664.37			z-stack45	300.95
z-stack41	257.603			z-stack44	4589.79			z-stack44	329.331
z-stack40	235.517			z-stack43	5681.51			z-stack43	248.314
z-stack39	204.968			z-stack42	5015.93			z-stack42	252.339
z-stack38	179.889			z-stack41	5363.53			z-stack41	228.808
z-stack37	244.083			z-stack40	4406.6			z-stack40	176.173
	466.802				1931.43				215.003
C0 (green)	Area			C0 (green)	Area			C0 (green)	Area
z-stack62	9319.11			z-stack65	2832.81			z-stack65	4490.61
z-stack61	10791.6			z-stack64	4187.08			z-stack64	5349.9
z-stack60	10699.1			z-stack63	7777.62			z-stack63	7849.15
z-stack59	13002.3			z-stack62	9549.26			z-stack62	10284.1
z-stack58	10930.5			z-stack61	9566.5			z-stack61	10560.7
z-stack57	8451.87			z-stack60	10465.4			z-stack60	11615.4
z-stack56	6922.46			z-stack59	10367.6			z-stack59	11887.7
z-stack55	6789.22			z-stack58	9106.72			z-stack58	10972.6
z-stack54	6815.12			z-stack57	9954.86			z-stack57	10428.6
z-stack53	7964.43			z-stack56	10871.3			z-stack56	10515.9
z-stack52	8019.13			z-stack55	11887.7			z-stack55	13149.1
z-stack51	8517.92			z-stack54	10903.1			z-stack54	15020
z-stack50	7501.65			z-stack53	9017.03			z-stack53	14216.1
z-stack49	6920.19			z-stack52	10866.9			z-stack52	12042.5
z-stack48	6730.49			z-stack51	7260.25			z-stack51	11127.4
z-stack47	6178.86			z-stack50	6043.04			z-stack50	9931.54
z-stack46	5297.99			z-stack49	7458.51			z-stack49	8346.6
z-stack45	5701.42			z-stack48	6616.97			z-stack48	7888.06
z-stack44	3795.93			z-stack47	5107.78			z-stack47	9912.65
z-stack43	3705.93			z-stack46	6334.08			z-stack46	10020.4
z-stack42	3341.41			z-stack45	6382.17			z-stack45	9714.6
z-stack41	3631.73			z-stack44	5659.21			z-stack44	9360.71
z-stack40	3044.38			z-stack43	5386.13			z-stack43	8339.38
z-stack39	2598.94			z-stack42	5715.46			z-stack42	7301.95
z-stack38	1866.8			z-stack41	4867.21			z-stack41	5774.19
z-stack37	1986.2			z-stack40	4141.36			z-stack40	6615.94
	6820.99				7933.05				10108.6
10uM1 (71-46)				10uM2 (63-38)				10uM3 (67-42)				10uM4 (71-46)
C1 (red)	Area			C1 (red)	Area			C1 (red)	Area			C1 (red)	area
z-stack71	115.797			z-stack63	2015.52			z-stack67	1927.58			z-stack71	427.584
z-stack70	113.114			z-stack62	1916.85			z-stack66	1613.42			z-stack70	669.467
z-stack69	90.409			z-stack61	1648.41			z-stack65	1472.13			z-stack69	963.534
z-stack68	54.803			z-stack60	2673.87			z-stack64	1327.23			z-stack68	1102.55
z-stack67	129.833			z-stack59	3243.26			z-stack63	1086.04			z-stack67	1723.75
z-stack66	226.744			z-stack58	4373.78			z-stack62	1139.6			z-stack66	1408.15
z-stack65	399.305			z-stack57	4555.22			z-stack61	1146.72			z-stack65	1671.53
z-stack64	514.793			z-stack56	5932.09			z-stack60	1125.77			z-stack64	1694.65
z-stack63	789.425			z-stack55	6352.76			z-stack59	1822.42			z-stack63	1894.25
z-stack62	1192.55			z-stack54	7566.98			z-stack58	2135.85			z-stack62	2282.3
z-stack61	1128.66			z-stack53	8961.4			z-stack57	2493.26			z-stack61	2935.39
z-stack60	1433.33			z-stack52	9968.49			z-stack56	2576.34			z-stack60	3564.54
z-stack59	1512.59			z-stack51	10364.3			z-stack55	3387.54			z-stack59	3842.89
z-stack58	1457.79			z-stack50	10712.9			z-stack54	4420.84			z-stack58	4746.04
z-stack57	1470.9			z-stack49	11587.8			z-stack53	5223.89			z-stack57	5619.27
z-stack56	1751.51			z-stack48	12232.7			z-stack52	5950.46			z-stack56	6395.9
z-stack55	1828.09			z-stack47	12208.9			z-stack51	6397.34			z-stack55	7107.61
z-stack54	1645.52			z-stack46	12931.6			z-stack50	7528.48			z-stack54	7289.56
z-stack53	1736.45			z-stack45	12937.7			z-stack49	8789.46			z-stack53	7837.79
z-stack52	1669.57			z-stack44	13908			z-stack48	9456.38			z-stack52	9157.7
z-stack51	2249.59			z-stack43	14869.4			z-stack47	10751.4			z-stack51	9293.11
z-stack50	2796.27			z-stack42	13365.5			z-stack46	11026.4			z-stack50	10243.8
z-stack49	2931.78			z-stack41	13144.4			z-stack45	11314			z-stack49	11340.1
z-stack48	3525.22			z-stack40	11776			z-stack44	12769.2			z-stack48	11529.8
z-stack47	3333.05			z-stack39	11458.8			z-stack43	8741.57			z-stack47	13060.2
z-stack46	3870.13			z-stack38	9233.35			z-stack42	4641.5			z-stack46	13413.1
	1518.69				9197.6				5210.59				5648.59
C0 (green)	Area			C0 (green)	Area			C0 (green)	Area			C0 (green)	area
z-stack71	4885.48			z-stack63	17440.9			z-stack67	4474.1			z-stack71	4429.82
z-stack70	6403.02			z-stack62	19307.4			z-stack66	5223.37			z-stack70	6378.25
z-stack69	7758.32			z-stack61	22108.3			z-stack65	6692.2			z-stack69	7330.74
z-stack68	10556.8			z-stack60	21885			z-stack64	7880.01			z-stack68	8647.24
z-stack67	11141.4			z-stack59	22533.4			z-stack63	8519.58			z-stack67	10062.9
z-stack66	13554.4			z-stack58	22771.8			z-stack62	8681.71			z-stack66	10952.2
z-stack65	14265.1			z-stack57	22454.5			z-stack61	8818.36			z-stack65	12145.8
z-stack64	15435.2			z-stack56	23109.3			z-stack60	9424.18			z-stack64	12884.8
z-stack63	16680.6			z-stack55	22480.7			z-stack59	10341.1			z-stack63	13725.4
z-stack62	17837.7			z-stack54	22315.9			z-stack58	11362			z-stack62	13286.5
z-stack61	17769.8			z-stack53	23626			z-stack57	12446			z-stack61	13664
z-stack60	20647.9			z-stack52	22175.8			z-stack56	11721.2			z-stack60	12548.5
z-stack59	19115.9			z-stack51	22707.7			z-stack55	11959.9			z-stack59	14809.6
z-stack58	18985.3			z-stack50	20076.1			z-stack54	13076.6			z-stack58	14061.9
z-stack57	17583.5			z-stack49	20902.4			z-stack53	13442.7			z-stack57	11891.3
z-stack56	18652.8			z-stack48	21048.2			z-stack52	13422.9			z-stack56	12979.2
z-stack55	18270.4			z-stack47	20618.8			z-stack51	14224.1			z-stack55	12666.2
z-stack54	17981			z-stack46	19818.3			z-stack50	13780.8			z-stack54	12157.8
z-stack53	17924.6			z-stack45	17945.8			z-stack49	14254.5			z-stack53	12514.3
z-stack52	17588.2			z-stack44	17199.2			z-stack48	13416.9			z-stack52	12749.2
z-stack51	16838			z-stack43	16493.2			z-stack47	13633.7			z-stack51	12367.2
z-stack50	17374.7			z-stack42	16444.4			z-stack46	12379.7			z-stack50	13203.2
z-stack49	15606.6			z-stack41	16090.3			z-stack45	11568.5			z-stack49	14054.7
z-stack48	15355.2			z-stack40	17115.6			z-stack44	10550			z-stack48	14390.4
z-stack47	14003.1			z-stack39	15386.4			z-stack43	9860.02			z-stack47	13033.4
z-stack46	13100.6			z-stack38	17241.7			z-stack42	10415.4			z-stack46	12955.8
	15812.6				20851.9				11262.8				12395.6
100uM1 (49-24)				100uM2 (59-34)				100uM3 (65-40)				100uM4 (69-44)
C1 (red)	Area			C1 (red)	Area			C1 (red)	Area			C1 (red)	area
z-stack49	802.119			z-stack59	155.635			z-stack65	223.751			z-stack69	260.802
z-stack48	845.672			z-stack58	231.285			z-stack64	410.555			z-stack68	325.719
z-stack47	832.049			z-stack57	291.764			z-stack63	913.995			z-stack67	300.433
z-stack46	859.708			z-stack56	575.891			z-stack62	1468.52			z-stack66	470.001
z-stack45	925.244			z-stack55	910.589			z-stack61	1535.61			z-stack65	1008.02
z-stack44	873.228			z-stack54	1086.04			z-stack60	2156.08			z-stack64	1360.36
z-stack43	593.643			z-stack53	2269.51			z-stack59	3089.89			z-stack63	1896
z-stack42	778.382			z-stack52	2189.01			z-stack58	3644.52			z-stack62	2630.11
z-stack41	914.201			z-stack51	2078.57			z-stack57	4061.99			z-stack61	2535.47
z-stack40	1092.54			z-stack50	2494.08			z-stack56	4460.89			z-stack60	3285.78
z-stack39	1270.68			z-stack49	2673.66			z-stack55	5461.47			z-stack59	4103.07
z-stack38	1014.21			z-stack48	1533.85			z-stack54	6549.88			z-stack58	4371.2
z-stack37	1426.83			z-stack47	1659.66			z-stack53	6990.99			z-stack57	4880.93
z-stack36	1414.24			z-stack46	1776.08			z-stack52	7474.61			z-stack56	5769.02
z-stack35	1486.07			z-stack45	1917.68			z-stack51	7827.47			z-stack55	6387.54
z-stack34	2090.86			z-stack44	1410.73			z-stack50	9075.24			z-stack54	8099.73
z-stack33	2614.22			z-stack43	912.653			z-stack49	10659.4			z-stack53	9061.72
z-stack32	3970.34			z-stack42	1872.06			z-stack48	12097.6			z-stack52	10011.7
z-stack31	4263.14			z-stack41	2247.73			z-stack47	12143.7			z-stack51	10091.3
z-stack30	3512.73			z-stack40	2720.21			z-stack46	12360			z-stack50	10649.5
z-stack29	5490.99			z-stack39	1615.28			z-stack45	6664.75			z-stack49	11651.2
z-stack28	7288.74			z-stack38	1813.64			z-stack44	4608.37			z-stack48	12659.2
z-stack27	7892.49			z-stack37	1765.14			z-stack43	5003.96			z-stack47	13983.1
z-stack26	8450.01			z-stack36	1403.4			z-stack42	5514			z-stack46	13535.4
z-stack25	6969.31			z-stack35	690.656			z-stack41	4227.54			z-stack45	12942.1
z-stack24	6266.79			z-stack34	430.577			z-stack40	5357.54			z-stack44	14023.5
	2957.54				1549.01				5759.29				6651.71
C0 (green)	Area			C0 (green)	Area			C0 (green)	Area			C0 (green)	area
z-stack49	2548.16			z-stack59	2517.61			z-stack65	3998.42			z-stack69	4150.03
z-stack48	4163.14			z-stack58	3493.02			z-stack64	5338.14			z-stack68	5970.69
z-stack47	5228.53			z-stack57	5020.68			z-stack63	7244.98			z-stack67	7154.05
z-stack46	6074.1			z-stack56	6733.69			z-stack62	8826.92			z-stack66	8666.95
z-stack45	6841.44			z-stack55	8834.77			z-stack61	9962.71			z-stack65	9346.05
z-stack44	8244.32			z-stack54	9761.46			z-stack60	11029.3			z-stack64	10673.1
z-stack43	9338.93			z-stack53	12751.5			z-stack59	11696.4			z-stack63	11898.4
z-stack42	9133.34			z-stack52	13642.2			z-stack58	12573.2			z-stack62	12058.5
z-stack41	7844.3			z-stack51	13725.9			z-stack57	12046.5			z-stack61	11444.8
z-stack40	8688.11			z-stack50	13177.3			z-stack56	11109.1			z-stack60	11664.3
z-stack39	10000.4			z-stack49	13388.7			z-stack55	11300.2			z-stack59	11819.5
z-stack38	10311.5			z-stack48	13790.7			z-stack54	11352.8			z-stack58	12338.6
z-stack37	9942.58			z-stack47	12243.7			z-stack53	11280.3			z-stack57	9839.79
z-stack36	9491.47			z-stack46	12430.2			z-stack52	10939.5			z-stack56	9449.57
z-stack35	9463.09			z-stack45	11496			z-stack51	10856.5			z-stack55	8876.67
z-stack34	9368.14			z-stack44	10696.9			z-stack50	10451.5			z-stack54	8377.36
z-stack33	9721.93			z-stack43	10400.2			z-stack49	10188			z-stack53	8315.43
z-stack32	10286			z-stack42	10504.4			z-stack48	9606.23			z-stack52	8144.63
z-stack31	9978.91			z-stack41	10990.8			z-stack47	9007.12			z-stack51	8430.2
z-stack30	9594.47			z-stack40	9758.05			z-stack46	8409.97			z-stack50	8565.3
z-stack29	9379.28			z-stack39	9193.61			z-stack45	8159.9			z-stack49	8427.72
z-stack28	8877.6			z-stack38	10087.3			z-stack44	8385.51			z-stack48	8239.89
z-stack27	7895.28			z-stack37	9009.91			z-stack43	7848.53			z-stack47	8162.79
z-stack26	7125.15			z-stack36	8684.09			z-stack42	7610.64			z-stack46	8255.68
z-stack25	5905.36			z-stack35	8098.29			z-stack41	7465.12			z-stack45	8301.4
z-stack24	5751.17			z-stack34	8362.5			z-stack40	8102.93			z-stack44	8086.11
	8447.87				10351.7				9791.62				9466.3
1mM1 (67-42)				1mM2 (47-22)				1mM3 (51-26)				1mM4 (48-23)
C1 (red)	Area			C1 (red)	Area			C1 (red)	Area			C1 (red)	Area
z-stack67	874.673			z-stack47	868.068			z-stack51	1261.8			z-stack48	2848.49
z-stack66	980.047			z-stack46	1524.25			z-stack50	2210.27			z-stack47	3360.6
z-stack65	1445.09			z-stack45	2002.31			z-stack49	3152.13			z-stack46	3923.08
z-stack64	1628.49			z-stack44	2485.72			z-stack48	4160.76			z-stack45	3840.2
z-stack63	1563.27			z-stack43	2863.15			z-stack47	4854.82			z-stack44	4393.9
z-stack62	2002.82			z-stack42	2602.24			z-stack46	5512.97			z-stack43	4288.53
z-stack61	2069.59			z-stack41	3786.12			z-stack45	6094.85			z-stack42	4465.74
z-stack60	2009.43			z-stack40	3682.5			z-stack44	6732.66			z-stack41	4607.13
z-stack59	2147			z-stack39	2889.57			z-stack43	7469.97			z-stack40	5147.41
z-stack58	2157.22			z-stack38	3796.65			z-stack42	8345.57			z-stack39	6171.84
z-stack57	2684.81			z-stack37	3756.19			z-stack41	9076.68			z-stack38	6764.86
z-stack56	2944.37			z-stack36	4102.55			z-stack40	10067			z-stack37	7222.07
z-stack55	3436.15			z-stack35	4267.89			z-stack39	10778.7			z-stack36	7554.8
z-stack54	2775.94			z-stack34	4769.57			z-stack38	10298.5			z-stack35	8764.9
z-stack53	2257.22			z-stack33	5299.13			z-stack37	10312.1			z-stack34	9513.04
z-stack52	2715.46			z-stack32	5639.6			z-stack36	10148.7			z-stack33	10307.6
z-stack51	2146.79			z-stack31	4814.26			z-stack35	10270.8			z-stack32	10586.1
z-stack50	2437.94			z-stack30	3929.48			z-stack34	9124.57			z-stack31	10642.3
z-stack49	2171.15			z-stack29	4878.25			z-stack33	8884.72			z-stack30	11275.8
z-stack48	1997.25			z-stack28	3046.44			z-stack32	9614.39			z-stack29	11401.8
z-stack47	2421.74			z-stack27	3956.1			z-stack31	9068.53			z-stack28	11410.5
z-stack46	1709.71			z-stack26	2971.41			z-stack30	8406.67			z-stack27	12090
z-stack45	1522.91			z-stack25	2944.99			z-stack29	7530.34			z-stack26	11952.1
z-stack44	1295.65			z-stack24	2722.89			z-stack28	7162.93			z-stack25	11670.3
z-stack43	1133.62			z-stack23	2056.28			z-stack27	6219.93			z-stack24	11375.1
z-stack42	1055.28			z-stack22	1496.7			z-stack26	6837.52			z-stack23	8026.66
	2063.35				3486.09				7743.91				7823.13
C0 (green)	Area			C0 (green)	Area			C0 (green)	Area			C0 (green)	Area
z-stack67	3446.78			z-stack47	2884.93			z-stack51	1242.09			z-stack48	1496.18
z-stack66	3870.86			z-stack46	3011.35			z-stack50	1763.07			z-stack47	1766.38
z-stack65	4387.81			z-stack45	3481.15			z-stack49	2869.65			z-stack46	2531.55
z-stack64	5218.83			z-stack44	3635.75			z-stack48	3523.88			z-stack45	2414.41
z-stack63	5881.83			z-stack43	3127.05			z-stack47	4205.35			z-stack44	2440.72
z-stack62	6512.52			z-stack42	3208.37			z-stack46	4896.21			z-stack43	2962.64
z-stack61	6797.58			z-stack41	3059.96			z-stack45	5250.93			z-stack42	2913.72
z-stack60	6611.7			z-stack40	4142.7			z-stack44	5410.69			z-stack41	3382.69
z-stack59	6400.96			z-stack39	3238.2			z-stack43	5674.07			z-stack40	3614.9
z-stack58	6231.8			z-stack38	3546.06			z-stack42	5325.65			z-stack39	3957.34
z-stack57	9127.36			z-stack37	3168.33			z-stack41	5353.31			z-stack38	4311.85
z-stack56	7933.36			z-stack36	3413.14			z-stack40	5201.39			z-stack37	4499.07
z-stack55	8830.33			z-stack35	3872.51			z-stack39	5453.42			z-stack36	4927.48
z-stack54	8009.22			z-stack34	4211.33			z-stack38	5433.09			z-stack35	5023.26
z-stack53	8934.88			z-stack33	3931.33			z-stack37	4395.04			z-stack34	5604.82
z-stack52	9225.2			z-stack32	4481.63			z-stack36	4840.79			z-stack33	5725.57
z-stack51	10279.7			z-stack31	5005.71			z-stack35	4991.36			z-stack32	5170.94
z-stack50	10130.7			z-stack30	4786.6			z-stack34	4727.26			z-stack31	4810.75
z-stack49	9991.92			z-stack29	4961.95			z-stack33	4239.82			z-stack30	4898.89
z-stack48	10097.3			z-stack28	4601.04			z-stack32	4524.87			z-stack29	4190.48
z-stack47	9230.67			z-stack27	4372.95			z-stack31	3948.16			z-stack28	4198.95
z-stack46	10132.3			z-stack26	4675.97			z-stack30	3708.82			z-stack27	3778.49
z-stack45	9654.02			z-stack25	3493.95			z-stack29	2829.09			z-stack26	3871.68
z-stack44	9502.82			z-stack24	3353.79			z-stack28	2985.34			z-stack25	3728.43
z-stack43	8652.3			z-stack23	3196.4			z-stack27	2771.4			z-stack24	3516.24
z-stack42	9281.55			z-stack22	3311.27			z-stack26	2596.57			z-stack23	3543.07
	8174.97				3926.94				4326.45				3971.22

## Sheet: day7 definitivo
				% live						% live
Ctrl1	M	867.461		93.5822		Ctrl4	M	66.4937		98.7987
	V	12649.1					V	5468.5
ctrl2	M	1900.04		82.2096		ctrl5	M	55.1576		99.247
	V	8780.09					V	7269.55
ctrl3	M	436.03		96.1454		ctrl6	M	32.8402		99.5115
	V	10875.8					V	6690.14
						ctrl7	M	46.3272		99.4577
0.1 uM 1	M	1518.6		88.8207			V	8496.84
	V	12065.5
0.1 uM 2	M	1614.7		86.6269
	V	10459.6
0.1 uM 3	M	488.17		95.7793
	V	11077.8
0.1 uM 4	M	1600.67		85.0216
	V	9085.85
1 uM 1	M	466.802		93.5947
	V	6820.99
1 uM 2	M	1931.43		80.4204
	V	7933.05
1 uM 3	M	215.003		97.9174
	V	10108.6
10 uM 1	M	1518.69		91.2373
	V	15812.6
10 uM 2	M	9197.6		69.3918
	V	20851.9
10 uM 3	M	5210.59		68.3696
	V	11262.8
10 uM 4	M	5648.59		68.6958
	V	12395.6
100 uM 1	M	2957.54		74.069
	V	8447.87
100 uM 2	M	1549.01		86.9839
	V	10351.7
100 uM 3	M	5759.29		62.9649
	V	9791.62
100 uM 4	M	6651.71		58.7312
	V	9466.3
1 mM	M	2063.35		79.8468
	V	8174.97
1 mM	M	3486.09		52.9734
	V	3926.94
1 mM	M	7743.91		35.8436
	V	4326.45
1 mM	M	7823.13		33.6705
	V	3971.22

## Sheet: day10
CtrlV1 (57-32)				CtrlV2 (59-34)				CtrlV3 (53-28)				CtrlV4 (58-33)
C1 (red)	Area			C1 (red)	Area			C1 (red)	Area			C1 (red)	Area
z-stack57	284.136			z-stack59	490.887			z-stack53	284.136			z-stack58	547.558
z-stack56	350.578			z-stack58	556.547			z-stack52	477.599			z-stack57	878.985
z-stack55	344.324			z-stack57	993.108			z-stack51	714.834			z-stack56	855.535
z-stack54	455.321			z-stack56	985.291			z-stack50	1060.72			z-stack55	957.151
z-stack53	970.83			z-stack55	1130.68			z-stack49	1095.51			z-stack54	1159.6
z-stack52	1059.94			z-stack54	1172.89			z-stack48	1371.83			z-stack53	1548.09
z-stack51	1201.42			z-stack53	1304.6			z-stack47	1358.54			z-stack52	1360.49
z-stack50	1226.44			z-stack52	1230.73			z-stack46	1374.17			z-stack51	1329.22
z-stack49	1133.81			z-stack51	1277.24			z-stack45	1328.05			z-stack50	1233.47
z-stack48	1347.2			z-stack50	1330.4			z-stack44	1130.29			z-stack49	1231.52
z-stack47	1525.03			z-stack49	1260.83			z-stack43	1036.1			z-stack48	1232.3
z-stack46	1096.68			z-stack48	1226.83			z-stack42	929.011			z-stack47	1091.21
z-stack45	900.09			z-stack47	1159.99			z-stack41	873.513			z-stack46	957.542
z-stack44	1041.57			z-stack46	989.59			z-stack40	850.454			z-stack45	845.373
z-stack43	774.241			z-stack45	921.976			z-stack39	784.403			z-stack44	936.828
z-stack42	627.288			z-stack44	866.478			z-stack38	668.325			z-stack43	919.631
z-stack41	512.383			z-stack43	857.098			z-stack37	578.434			z-stack42	842.246
z-stack40	379.108			z-stack42	771.114			z-stack36	471.345			z-stack41	838.338
z-stack39	251.306			z-stack41	714.444			z-stack35	469.782			z-stack40	601.102
z-stack38	187.6			z-stack40	607.355			z-stack34	568.272			z-stack39	491.669
z-stack37	143.045			z-stack39	325.173			z-stack33	388.879			z-stack38	435.779
z-stack36	153.598			z-stack38	274.756			z-stack32	213.395			z-stack37	406.467
z-stack35	130.538			z-stack37	181.738			z-stack31	236.063			z-stack36	300.16
z-stack34	77.776			z-stack36	179.783			z-stack30	172.748			z-stack35	241.926
z-stack33	49.245			z-stack35	116.078			z-stack29	128.193			z-stack34	224.338
z-stack32	53.935			z-stack34	65.269			z-stack28	133.665			z-stack33	175.875
	651.097				839.635				747.93				865.696
C0 (green)	Area			C0 (green)	Area			C0 (green)	Area			C0 (green)	Area
z-stack57	9228.36			z-stack59	7356.66			z-stack53	8384.94			z-stack58	7727.95
z-stack56	12007.6			z-stack58	8731.61			z-stack52	9146.68			z-stack57	7924.93
z-stack55	13669.4			z-stack57	9681.34			z-stack51	10251.2			z-stack56	9375.31
z-stack54	15180.4			z-stack56	10931.2			z-stack50	11727.4			z-stack55	11207.2
z-stack53	15458.6			z-stack55	12790			z-stack49	13822.6			z-stack54	12106.1
z-stack52	13746.8			z-stack54	14702.4			z-stack48	15756.1			z-stack53	12908.4
z-stack51	14088.8			z-stack53	15588			z-stack47	17163.5			z-stack52	13262.2
z-stack50	14359.2			z-stack52	16381.8			z-stack46	18008.4			z-stack51	14774.7
z-stack49	14455			z-stack51	16017.5			z-stack45	17711.8			z-stack50	17124.8
z-stack48	16279.4			z-stack50	16304.4			z-stack44	16409.9			z-stack49	17047
z-stack47	16402.5			z-stack49	16739.4			z-stack43	15951.9			z-stack48	15809.6
z-stack46	16369.3			z-stack48	16826.2			z-stack42	15887			z-stack47	15553.7
z-stack45	16635			z-stack47	17154.5			z-stack41	14970.5			z-stack46	14871.3
z-stack44	16849.2			z-stack46	16877.8			z-stack40	14268.2			z-stack45	14421.6
z-stack43	16466.2			z-stack45	16655			z-stack39	13192.6			z-stack44	13331
z-stack42	16715.2			z-stack44	14392.4			z-stack38	12175.6			z-stack43	11690.6
z-stack41	14630.1			z-stack43	13140.2			z-stack37	12172.1			z-stack42	10351.6
z-stack40	8502.97			z-stack42	11077.4			z-stack36	12081.4			z-stack41	10010.4
z-stack39	7582.17			z-stack41	11090.7			z-stack35	13865.2			z-stack40	10421.6
z-stack38	7210.88			z-stack40	10349.7			z-stack34	13871.9			z-stack39	10567.7
z-stack37	7291.78			z-stack39	10046			z-stack33	12764.2			z-stack38	10352.4
z-stack36	7894.84			z-stack38	8984.48			z-stack32	11411.2			z-stack37	9998.76
z-stack35	6691.85			z-stack37	8580.75			z-stack31	11565.2			z-stack36	9993.79
z-stack34	6599.22			z-stack36	9447.62			z-stack30	10864.4			z-stack35	9997.89
z-stack33	7000.22			z-stack35	9454.26			z-stack29	8807.04			z-stack34	8495.16
z-stack32	6722.34			z-stack34	7287.48			z-stack28	8433.01			z-stack33	8249.71
	12721.5				13063.5				13626.6				12303
0.1uM1 (66-41)				0.1uM2 (51-26)				0.1uM3 (55-30)
C1 (red)	Area			C1 (red)	Area			C1 (red)	Area
z-stack66	2210.55			z-stack51	1775.95			z-stack55	1963.55
z-stack65	2886.7			z-stack50	2118.71			z-stack54	2247.68
z-stack64	3279.09			z-stack49	2410.66			z-stack53	3185.68
z-stack63	4301.51			z-stack48	2615.46			z-stack52	4270.25
z-stack62	5418.91			z-stack47	2923.04			z-stack51	4717.75
z-stack61	6337.76			z-stack46	3245.09			z-stack50	5091.39
z-stack60	6545.68			z-stack45	3490.53			z-stack49	5372.01
z-stack59	5576.02			z-stack44	3683.22			z-stack48	5555.31
z-stack58	4321.84			z-stack43	3903.25			z-stack47	6650.03
z-stack57	3683.61			z-stack42	4595.42			z-stack46	6743.44
z-stack56	3485.06			z-stack41	4028.32			z-stack45	7516.9
z-stack55	3500.7			z-stack40	3973.6			z-stack44	8470.53
z-stack54	3717.22			z-stack39	4278.85			z-stack43	8662.04
z-stack53	3900.52			z-stack38	4505.53			z-stack42	9771.23
z-stack52	3715.65			z-stack37	4379.29			z-stack41	10050.7
z-stack51	3433.08			z-stack36	5248.89			z-stack40	10204.7
z-stack50	2953.14			z-stack35	6903.29			z-stack39	10333.6
z-stack49	2820.26			z-stack34	8210.24			z-stack38	10362.6
z-stack48	2748.73			z-stack33	8717.54			z-stack37	11766.4
z-stack47	3558.93			z-stack32	9152.93			z-stack36	7865.52
z-stack46	5822.25			z-stack31	8769.13			z-stack35	7819.02
z-stack45	7020.93			z-stack30	9171.3			z-stack34	6651.2
z-stack44	8694.09			z-stack29	8803.13			z-stack33	8812.91
z-stack43	9038.42			z-stack28	9779.44			z-stack32	8582.7
z-stack42	9225.23			z-stack27	9729.02			z-stack31	4490.68
z-stack41	11209.1			z-stack26	10833.5			z-stack30	4195.21
	5176.2				5889.81				7254.12
C0 (green)	Area			C0 (green)	Area			C0 (green)	Area
z-stack66	2983.62			z-stack51	3262.29			z-stack55	10200
z-stack65	5175.42			z-stack50	5721.41			z-stack54	12404.7
z-stack64	7231.59			z-stack49	6954.1			z-stack53	13271.5
z-stack63	8822.67			z-stack48	8384.55			z-stack52	13446.6
z-stack62	10338.3			z-stack47	9866.2			z-stack51	12546.9
z-stack61	11836			z-stack46	12218.6			z-stack50	12471.9
z-stack60	13177.3			z-stack45	13707.3			z-stack49	12633.7
z-stack59	14750.8			z-stack44	14881.4			z-stack48	12572.3
z-stack58	15318.3			z-stack43	15562.6			z-stack47	12655.6
z-stack57	16347.8			z-stack42	15695.1			z-stack46	13956.3
z-stack56	16705			z-stack41	15505.9			z-stack45	13894.9
z-stack55	16585.8			z-stack40	13852.7			z-stack44	14280.7
z-stack54	14294.3			z-stack39	12875.2			z-stack43	13771
z-stack53	13449.8			z-stack38	11462.4			z-stack42	11949.3
z-stack52	13706.5			z-stack37	10286			z-stack41	12734.1
z-stack51	13957.8			z-stack36	10788.2			z-stack40	12325.7
z-stack50	14285.4			z-stack35	10167.9			z-stack39	11972
z-stack49	14247.4			z-stack34	11925.9			z-stack38	11586.3
z-stack48	13304			z-stack33	11697.3			z-stack37	11023.5
z-stack47	12444.5			z-stack32	11673.4			z-stack36	10830.8
z-stack46	10157			z-stack31	9016.14			z-stack35	10122.6
z-stack45	9865.03			z-stack30	9517.97			z-stack34	9774.75
z-stack44	9561.35			z-stack29	7757.65			z-stack33	9262.36
z-stack43	8401.75			z-stack28	7099.49			z-stack32	8762.88
z-stack42	9032.94			z-stack27	7607.18			z-stack31	8578.01
z-stack41	8008.18			z-stack26	6911.5			z-stack30	8003.88
	12159.5				10975.9				12201.3
1uM1 (33-8)				1uM2 (47-22)				1uM3 (31-6)				1uM4 (54-29)
C1 (red)	Area			C1 (red)	Area			C1 (red)	Area			C1 (red)	Area
z-stack33	1845.12			z-stack47	3277.53			z-stack31	3515.16			z-stack54	1834.57
z-stack32	1904.92			z-stack46	3730.51			z-stack30	3941.95			z-stack53	2106.98
z-stack31	2150.37			z-stack45	4042.78			z-stack29	4484.42			z-stack52	2646.72
z-stack30	2336.4			z-stack44	4130.72			z-stack28	4619.65			z-stack51	3570.26
z-stack29	2450.53			z-stack43	4296.04			z-stack27	5362.63			z-stack50	3853.62
z-stack28	2555.66			z-stack42	4134.24			z-stack26	5318.46			z-stack49	4648.18
z-stack27	2726.45			z-stack41	4197.16			z-stack25	6084.89			z-stack48	5434.93
z-stack26	3129.4			z-stack40	4394.53			z-stack24	6228.71			z-stack47	5239.51
z-stack25	3752.39			z-stack39	4308.55			z-stack23	6208.39			z-stack46	5736.65
z-stack24	4194.82			z-stack38	3950.94			z-stack22	6103.65			z-stack45	5656.53
z-stack23	4552.43			z-stack37	4004.09			z-stack21	6453.83			z-stack44	6056.75
z-stack22	4684.53			z-stack36	4416.42			z-stack20	6735.23			z-stack43	6792.69
z-stack21	4761.13			z-stack35	5389.59			z-stack19	6807.93			z-stack42	7781.89
z-stack20	5042.53			z-stack34	6066.13			z-stack18	8008.18			z-stack41	8408.39
z-stack19	5348.56			z-stack33	6570.3			z-stack17	8854.33			z-stack40	9249.08
z-stack18	6480.8			z-stack32	7331.26			z-stack16	9654.37			z-stack39	9542.59
z-stack17	8600.68			z-stack31	8410.74			z-stack15	10938.6			z-stack38	9991.66
z-stack16	9929.52			z-stack30	8764.05			z-stack14	12564.9			z-stack37	10142.5
z-stack15	10743.2			z-stack29	9318.25			z-stack13	13350.1			z-stack36	10284.8
z-stack14	10558.8			z-stack28	10276.2			z-stack12	13578.3			z-stack35	11159.5
z-stack13	10554.5			z-stack27	11272.8			z-stack11	14580.8			z-stack34	10991.4
z-stack12	6186.11			z-stack26	11817.2			z-stack10	15673.2			z-stack33	10862.8
z-stack11	7160.85			z-stack25	12778.7			z-stack9	11461.6			z-stack32	10452.5
z-stack10	5470.89			z-stack24	13130.8			z-stack8	10574			z-stack31	7376.2
z-stack9	5178.54			z-stack23	13975.4			z-stack7	9923.65			z-stack30	6487.05
z-stack8	4348.8			z-stack22	14231.8			z-stack6	8261.83			z-stack29	6601.57
	5465.92				7528.67				8771.55				7316.37
C0 (green)	Area			C0 (green)	Area			C0 (green)	Area			C0 (green)	Area
z-stack33	11476			z-stack47	6295.15			z-stack31	7691.21			z-stack54	7379.33
z-stack32	11707.4			z-stack46	7998.02			z-stack30	10956.2			z-stack53	8048.43
z-stack31	11467.4			z-stack45	9270.57			z-stack29	13336.8			z-stack52	8649.93
z-stack30	12529			z-stack44	10432.5			z-stack28	15632.2			z-stack51	9397.59
z-stack29	13024.1			z-stack43	11877			z-stack27	17705.5			z-stack50	10630.3
z-stack28	14475.3			z-stack42	13547.5			z-stack26	16195			z-stack49	11141.1
z-stack27	12047.8			z-stack41	15014.7			z-stack25	16183.2			z-stack48	11114.1
z-stack26	12435.5			z-stack40	15962			z-stack24	15749			z-stack47	10797.9
z-stack25	12805.7			z-stack39	16350.1			z-stack23	15841.3			z-stack46	10889.4
z-stack24	12928.8			z-stack38	16366.5			z-stack22	13619			z-stack45	11701.6
z-stack23	12940.5			z-stack37	15062.3			z-stack21	13302			z-stack44	12138.5
z-stack22	12489.9			z-stack36	14227.9			z-stack20	12516.1			z-stack43	12222.5
z-stack21	13191.8			z-stack35	13782			z-stack19	12209.2			z-stack42	12918.6
z-stack20	13375.1			z-stack34	13709.3			z-stack18	12482.8			z-stack41	13178.9
z-stack19	13390.7			z-stack33	13733.9			z-stack17	11659.3			z-stack40	13341.5
z-stack18	11989.2			z-stack32	13699.1			z-stack16	11428.8			z-stack39	13190.6
z-stack17	12124.8			z-stack31	12903.8			z-stack15	11285.3			z-stack38	12681
z-stack16	11278.7			z-stack30	12673.2			z-stack14	11981.4			z-stack37	12517.6
z-stack15	11606.2			z-stack29	12260.8			z-stack13	10906.2			z-stack36	11546.4
z-stack14	11512.4			z-stack28	11787.1			z-stack12	10286.3			z-stack35	10837.4
z-stack13	9407.36			z-stack27	11846.9			z-stack11	9986.97			z-stack34	10308.2
z-stack12	10471.2			z-stack26	11410			z-stack10	9816.96			z-stack33	10085.5
z-stack11	9302.23			z-stack25	11545.2			z-stack9	9539.85			z-stack32	8891.85
z-stack10	9567.21			z-stack24	9238.91			z-stack8	9607.47			z-stack31	8327.49
z-stack9	9884.96			z-stack23	8468.97			z-stack7	8172.72			z-stack30	8219.23
z-stack8	8505.32			z-stack22	8077.75			z-stack6	7474.3			z-stack29	7687.69
	12237.4				12701.7				12622.6				11630.5
10uM1 (38-13)				10uM2 (41-16)				10uM3 (48-23)				10uM4 (45-20)
C1 (red)	Area			C1 (red)	Area			C1 (red)	Area			C1 (red)	Area
z-stack38	1492.59			z-stack41	1452.34			z-stack48	1533.63			z-stack45	2452.09
z-stack37	1682.15			z-stack40	1621.96			z-stack47	1650.1			z-stack44	2672.52
z-stack36	1973.71			z-stack39	2158.96			z-stack46	2557.22			z-stack43	3617.16
z-stack35	2191.01			z-stack38	2720.98			z-stack45	3658.2			z-stack42	3647.26
z-stack34	2512.67			z-stack37	3296.68			z-stack44	3705.88			z-stack41	4280.8
z-stack33	2502.9			z-stack36	3433.08			z-stack43	4087.34			z-stack40	5458.77
z-stack32	2563.87			z-stack35	4541.88			z-stack42	4145.18			z-stack39	6477.28
z-stack31	2863.25			z-stack34	4597.77			z-stack41	4937.79			z-stack38	7229.25
z-stack30	3124.32			z-stack33	4390.62			z-stack40	5671.39			z-stack37	7379.33
z-stack29	3844.63			z-stack32	4880.34			z-stack39	6433.51			z-stack36	7335.55
z-stack28	4727.13			z-stack31	5003.06			z-stack38	6511.29			z-stack35	7223.78
z-stack27	5189.49			z-stack30	5155.88			z-stack37	6651.6			z-stack34	7333.6
z-stack26	5848.43			z-stack29	5284.07			z-stack36	7117.47			z-stack33	7507.13
z-stack25	6233.4			z-stack28	5731.96			z-stack35	7618.13			z-stack32	8150.05
z-stack24	6306.1			z-stack27	6236.14			z-stack34	7931.18			z-stack31	8958.3
z-stack23	6709.83			z-stack26	6551.15			z-stack33	8181.71			z-stack30	10060.4
z-stack22	6809.49			z-stack25	6497.61			z-stack32	8271.21			z-stack29	11111
z-stack21	6961.14			z-stack24	7360.57			z-stack31	8777.34			z-stack28	12178
z-stack20	6757.9			z-stack23	7614.61			z-stack30	9840.41			z-stack27	12758
z-stack19	6470.64			z-stack22	7981.99			z-stack29	11112.6			z-stack26	13338
z-stack18	6082.93			z-stack21	8854.33			z-stack28	12290.5			z-stack25	14081.3
z-stack17	6571.86			z-stack20	9062.26			z-stack27	13139			z-stack24	14735.6
z-stack16	7625.94			z-stack19	6979.51			z-stack26	13587.3			z-stack23	15040.4
z-stack15	8809.78			z-stack18	5352.07			z-stack25	14401.8			z-stack22	15613
z-stack14	10495.4			z-stack17	5449.78			z-stack24	15595			z-stack21	16145.7
z-stack13	11854			z-stack16	4017.38			z-stack23	15770.5			z-stack20	16500.6
	5528.18				5449.08				8207.1				9651.4
C0 (green)	Area			C0 (green)	Area			C0 (green)	Area			C0 (green)	Area
z-stack38	5321.59			z-stack41	4988.21			z-stack48	4079.52			z-stack45	5175.03
z-stack37	6575.77			z-stack40	6002.42			z-stack47	4536.8			z-stack44	5416.95
z-stack36	7366.04			z-stack39	6665.27			z-stack46	6595.31			z-stack43	5869.54
z-stack35	8177.02			z-stack38	7716.62			z-stack45	8469.75			z-stack42	6702.01
z-stack34	9306.14			z-stack37	8474.44			z-stack44	10466.9			z-stack41	7307.81
z-stack33	10160.9			z-stack36	9295.19			z-stack43	11621.8			z-stack40	7960.89
z-stack32	11107.9			z-stack35	9258.06			z-stack42	12695.8			z-stack39	8219.62
z-stack31	11988.4			z-stack34	9027.86			z-stack41	13178.5			z-stack38	8567.07
z-stack30	12767			z-stack33	8700.34			z-stack40	12769.3			z-stack37	8781.25
z-stack29	12807.2			z-stack32	8427.54			z-stack39	11757.8			z-stack36	9234.22
z-stack28	12990.9			z-stack31	8689.4			z-stack38	11135.2			z-stack35	9385.48
z-stack27	12741.6			z-stack30	8991.91			z-stack37	10443.9			z-stack34	9277.61
z-stack26	11864.9			z-stack29	9074.37			z-stack36	10275.8			z-stack33	9050.14
z-stack25	11099.7			z-stack28	9329.2			z-stack35	10157.8			z-stack32	8510.01
z-stack24	11151.7			z-stack27	9293.63			z-stack34	10192.2			z-stack31	8544.79
z-stack23	11004.7			z-stack26	9231.88			z-stack33	10690.9			z-stack30	8062.5
z-stack22	10907			z-stack25	7995.28			z-stack32	11129.4			z-stack29	7970.66
z-stack21	10661.5			z-stack24	7957.76			z-stack31	11027.8			z-stack28	7873.34
z-stack20	9664.14			z-stack23	7489.54			z-stack30	10503.3			z-stack27	6746.18
z-stack19	9394.86			z-stack22	6879.06			z-stack29	10371.5			z-stack26	6533.17
z-stack18	8981.75			z-stack21	6798.16			z-stack28	9921.7			z-stack25	6394.43
z-stack17	8968.07			z-stack20	6013.76			z-stack27	9700.1			z-stack24	5455.25
z-stack16	8773.43			z-stack19	5901.19			z-stack26	9086.88			z-stack23	4819.37
z-stack15	8865.67			z-stack18	5722.58			z-stack25	8625.31			z-stack22	4343.72
z-stack14	8748.42			z-stack17	5373.18			z-stack24	8219.23			z-stack21	4129.94
z-stack13	8216.1			z-stack16	5125.39			z-stack23	7978.48			z-stack20	2898.03
	10384.5				7936.89				10225.2				7329.16
100uM1 (52-27)				100uM2 (45-20)				100uM3 (69-44)
C1 (red)	Area			C1 (red)	Area			C1 (red)	Area
z-stack52	1178.75			z-stack45	1619.22			z-stack69	1307.34
z-stack51	1407.78			z-stack44	1968.24			z-stack68	2333.67
z-stack50	1683.71			z-stack43	2151.15			z-stack67	2452.09
z-stack49	1972.54			z-stack42	2416.13			z-stack66	2932.42
z-stack48	2339.14			z-stack41	2427.86			z-stack65	3103.61
z-stack47	2509.93			z-stack40	2611.94			z-stack64	3651.56
z-stack46	2533.38			z-stack39	2729.19			z-stack63	4372.65
z-stack45	2870.67			z-stack38	2899.2			z-stack62	4557.12
z-stack44	3181.39			z-stack37	3426.05			z-stack61	4891.28
z-stack43	3801.64			z-stack36	4093.59			z-stack60	5083.57
z-stack42	3967.74			z-stack35	3803.98			z-stack59	5137.12
z-stack41	5055.43			z-stack34	4081.08			z-stack58	5422.03
z-stack40	5973.11			z-stack33	4906.13			z-stack57	5376.7
z-stack39	6797.77			z-stack32	5475.97			z-stack56	6263.5
z-stack38	8044.92			z-stack31	5895.72			z-stack55	7440.3
z-stack37	8887.94			z-stack30	5917.61			z-stack54	8667.91
z-stack36	9573.86			z-stack29	5962.16			z-stack53	10333.2
z-stack35	10414.1			z-stack28	6646.12			z-stack52	11392
z-stack34	10540.8			z-stack27	7133.88			z-stack51	12794.7
z-stack33	10399.3			z-stack26	8337.65			z-stack50	14223.2
z-stack32	8383.77			z-stack25	8943.83			z-stack49	15622.4
z-stack31	6465.17			z-stack24	8368.14			z-stack48	14104.8
z-stack30	6085.67			z-stack23	8015.99			z-stack47	13248.5
z-stack29	4993.29			z-stack22	7838.56			z-stack46	12355.4
z-stack28	4937.01			z-stack21	7595.07			z-stack45	10554.9
z-stack27	4237.42			z-stack20	7385.97			z-stack44	9412.44
	5529.45				5306.02				7881.38
C0 (green)	Area			C0 (green)	Area			C0 (green)	Area
z-stack52	5118.75			z-stack45	5829.28			z-stack69	12551.2
z-stack51	7157.73			z-stack44	6313.13			z-stack68	14212.7
z-stack50	8806.26			z-stack43	6388.56			z-stack67	15610.3
z-stack49	10244.9			z-stack42	6988.49			z-stack66	16711.7
z-stack48	11198.6			z-stack41	8132.07			z-stack65	16925.4
z-stack47	11780.5			z-stack40	9312.78			z-stack64	16991.1
z-stack46	12303.8			z-stack39	9721.2			z-stack63	17569.5
z-stack45	12290.1			z-stack38	9333.89			z-stack62	17698.5
z-stack44	12155.7			z-stack37	9324.11			z-stack61	17312
z-stack43	11658.2			z-stack36	9267.83			z-stack60	17151.7
z-stack42	11194.3			z-stack35	8869.18			z-stack59	17361.6
z-stack41	10726.8			z-stack34	8495.55			z-stack58	16239.9
z-stack40	10859.7			z-stack33	8307.95			z-stack57	14970.5
z-stack39	10823			z-stack32	7891.71			z-stack56	14453.4
z-stack38	10911.7			z-stack31	7928.06			z-stack55	14051.6
z-stack37	10943.3			z-stack30	7755.7			z-stack54	13441.9
z-stack36	10715.1			z-stack29	7219.48			z-stack53	13391.5
z-stack35	8139.89			z-stack28	7286.31			z-stack52	12879.1
z-stack34	7123.33			z-stack27	7008.82			z-stack51	12338.2
z-stack33	7178.05			z-stack26	7031.1			z-stack50	11619.5
z-stack32	6890			z-stack25	6968.95			z-stack49	10869.5
z-stack31	6669.97			z-stack24	6523.79			z-stack48	10686.6
z-stack30	5543.97			z-stack23	5984.44			z-stack47	10201.9
z-stack29	5440.4			z-stack22	5956.3			z-stack46	10064
z-stack28	4584.87			z-stack21	5631.91			z-stack45	10148.8
z-stack27	3565.57			z-stack20	5753.07			z-stack44	10192.2
	9360.98				7808.95				14625.8
1mM1 (43-18)				1mM2 (54-29)				1mM3 (46-21)
C1 (red)	Area			C1 (red)	Area			C1 (red)	Area
z-stack43	2500.55			z-stack54	2635.78			z-stack46	1560.72
z-stack42	2532.99			z-stack53	4466.84			z-stack45	1620.97
z-stack41	2679.16			z-stack52	4512.17			z-stack44	1880.43
z-stack40	4345.29			z-stack51	4994.85			z-stack43	2449.18
z-stack39	4494.59			z-stack50	5381.39			z-stack42	3275.28
z-stack38	5767.14			z-stack49	5434.54			z-stack41	3626.64
z-stack37	4145.18			z-stack48	5742.91			z-stack40	5109.34
z-stack36	5781.99			z-stack47	5951.61			z-stack39	5839.24
z-stack35	5395.07			z-stack46	5742.91			z-stack38	6479.02
z-stack34	7147.17			z-stack45	6345.57			z-stack37	6228.56
z-stack33	8732.39			z-stack44	9391.34			z-stack36	6870.69
z-stack32	8661.65			z-stack43	9883.79			z-stack35	6569.48
z-stack31	7980.82			z-stack42	10349.7			z-stack34	7823.78
z-stack30	8547.53			z-stack41	11957.9			z-stack33	7919.64
z-stack29	8514.31			z-stack40	7383.24			z-stack32	7760.58
z-stack28	8685.1			z-stack39	7039.3			z-stack31	8624.3
z-stack27	7677.14			z-stack38	7610.7			z-stack30	8286.4
z-stack26	7493.84			z-stack37	7143.26			z-stack29	9488.52
z-stack25	6947.85			z-stack36	5429.46			z-stack28	9598.43
z-stack24	5490.43			z-stack35	5314.16			z-stack27	8855.06
z-stack23	5394.68			z-stack34	4860.02			z-stack26	8591.05
z-stack22	4691.96			z-stack33	3765.29			z-stack25	7841.54
z-stack21	4308.16			z-stack32	3689.47			z-stack24	7447.43
z-stack20	3780.53			z-stack31	3046.16			z-stack23	6216.19
z-stack19	3345.53			z-stack30	2711.6			z-stack22	5990.39
z-stack18	3192.72			z-stack29	2459.51			z-stack21	4364.54
	5929.35				6129.74				6412.69
C0 (green)	Area			C0 (green)	Area			C0 (green)	Area
z-stack43	6157.97			z-stack54	4863.14			z-stack46	2430.24
z-stack42	6820.83			z-stack53	6684.82			z-stack45	3218.22
z-stack41	6968.95			z-stack52	7962.84			z-stack44	3636.82
z-stack40	6842.32			z-stack51	8395.1			z-stack43	3358.51
z-stack39	6702.8			z-stack50	8643.67			z-stack42	3128
z-stack38	7053.37			z-stack49	8476.01			z-stack41	4408.3
z-stack37	8021.47			z-stack48	8284.11			z-stack40	4551.28
z-stack36	7547.39			z-stack47	8062.5			z-stack39	5182.64
z-stack35	7419.19			z-stack46	7935.48			z-stack38	6099.55
z-stack34	7354.31			z-stack45	7987.85			z-stack37	4918.13
z-stack33	7326.17			z-stack44	7375.03			z-stack36	5321.42
z-stack32	7264.03			z-stack43	6043.07			z-stack35	6258.6
z-stack31	6963.09			z-stack42	6326.03			z-stack34	5305.51
z-stack30	6681.69			z-stack41	6452.27			z-stack33	5057.83
z-stack29	6734.45			z-stack40	6893.52			z-stack32	5584.58
z-stack28	6551.15			z-stack39	6884.53			z-stack31	5688.35
z-stack27	6347.14			z-stack38	6077.07			z-stack30	6921.27
z-stack26	5955.91			z-stack37	5414.22			z-stack29	6236.56
z-stack25	5480.66			z-stack36	5137.9			z-stack28	6242.7
z-stack24	5153.14			z-stack35	4666.55			z-stack27	6602.39
z-stack23	5253.98			z-stack34	4341.38			z-stack26	6405.8
z-stack22	5228.57			z-stack33	4100.62			z-stack25	5603.43
z-stack21	5123.05			z-stack32	4289.01			z-stack24	6056.46
z-stack20	4866.27			z-stack31	3879.8			z-stack23	6255.07
z-stack19	4654.83			z-stack30	3852.84			z-stack22	5835.62
z-stack18	4378.9			z-stack29	3984.94			z-stack21	5625.73
	6594.06				6520.57				5437.32

## Sheet: day 10 definitivo
				% live
Ctrl1	M	651.097		95.1311
	V	12721.5
ctrl2	M	839.635		93.9608
	V	13063.5
ctrl3	M	747.93		94.7968
	V	13626.6
ctrl4	M	865.696		93.4261
	V	12303
0.1 uM 1	M	5176.2		70.1415
	V	12159.5
0.1 uM 2	M	5889.81		65.0783
	V	10975.9
0.1 uM 3	M	7254.12		62.7141
	V	12201.3
1 uM 1	M	5465.92		69.1249
	V	12237.4
1 uM 2	M	7528.67		62.7852
	V	12701.7
1 uM 3	M	8771.55		59.0002
	V	12622.6
1 uM 4	M	7316.37		61.3847
	V	11630.5
10 uM 1	M	5528.18		65.2592
	V	10384.5
10 uM 2	M	5449.08		59.2926
	V	7936.89
10 uM 3	M	8207.1		55.4745
	V	10225.2
10 uM 4	M	9651.4		43.1621
	V	7329.16
100 uM 1	M	5529.45		62.8657
	V	9360.98
100 uM 2	M	5306.02		59.5423
	V	7808.95
100 uM 3	M	7881.38		64.9828
	V	14625.8
1 mM	M	5929.35		52.6539
	V	6594.06
1 mM	M	6129.74		51.5448
	V	6520.57
1 mM	M	6412.69		45.8845
	V	5437.32
